# Supplementary material for: Spatial Learning and Action Planning in a Prefrontal Cortical Network Model
Source: PubMed Central journal article supplement (PMC3098199; doi:10.1371/journal.pcbi.1002045), 2011-05-19

A

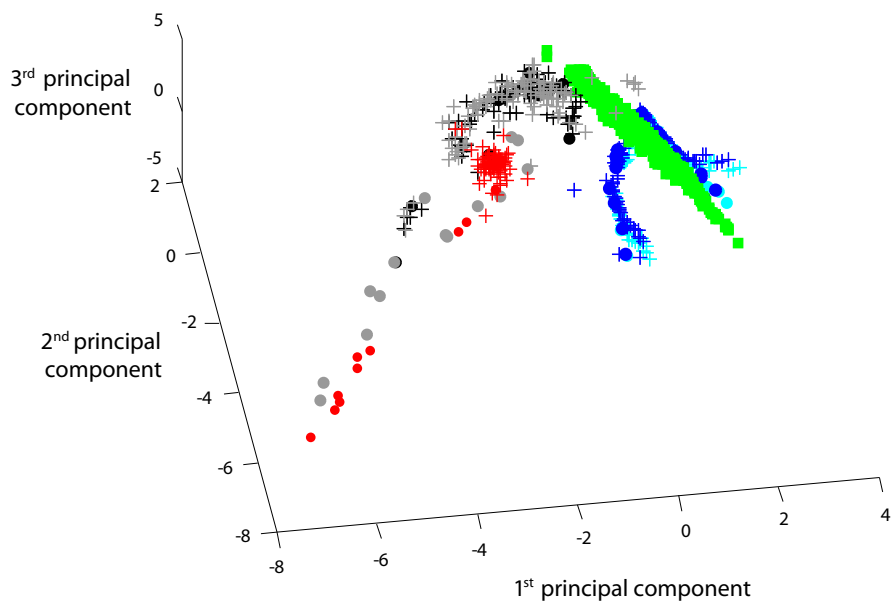

B

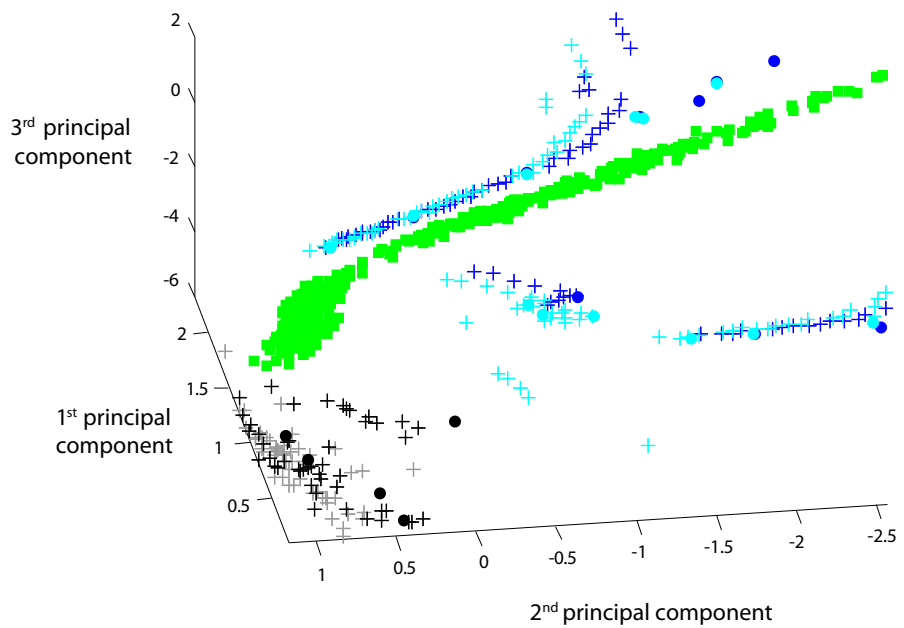

Supplement: pcbi.1002045.s005.pdf [file pcbi.1002045.s005.pdf]
